# Supplementary material for: Penetrating effect of high-intensity infrared laser pulses through body tissue
Source: Royal Society of Chemistry journal article supplement (doi:10.1039/c8ra05285a), 2018-01-01

## Supplementary Information

### Penetrating effect of high-intensity infrared laser pulses through body tissues

Danhong Han<sup>1</sup>, Jingjing Xu<sup>1</sup>, Zhenhai Wang<sup>1</sup>, Nana Yang<sup>1</sup>, Xunzhou Li<sup>2</sup>, Yingying Qian<sup>2</sup>, Ge Li<sup>2</sup>, Rujun Dai<sup>2</sup>, & Shengyong Xu<sup>1\*</sup>

<sup>1</sup> Key Laboratory for the Physics & Chemistry of Nanodevices, and Department of Electronics, Peking University, Beijing, 100871, P. R. China

<sup>2</sup> TED Healthcare Technology Ltd, Unit 350, 3/F, Block B, Beijing Venture Plaza, A11, An Xiang Bei li Rd., Beijing, 100101, P.R. China

\*Correspondence authors: xusy@pku.edu.cn    Tel: +86-10-62757261

#### Contents

**Supplementary Table S1:** Attenuated laser powers at four different laser wavelengths 325nm, 488nm, 633nm, and 785nm.

**Supplementary Figure S1:** A failed device after tested with a 785 nm laser at the power of 79.2 mW.

**Supplementary Figure S2:** Photographs of the measurement systems used in this work, one for practical clinic laser treatment, and the other for cleanroom applications.

**Supplementary Figure S3:** Outputs of TFTCs for the same part of a porcine skin tissue sample under laser irradiation of two different powers.

**Supplementary Figure S4:** Photographs of fabrication processes for the device with TFTC array on Si<sub>3</sub>N<sub>4</sub> windows used in this work.

**Supplementary Video S1:** A video showing irradiation of 1064 nm laser pulses (from a Nd:YAG pulsed laser) on a 10 mm thick porcine skin-fat-muscle sample during a 120 s test process.

**Supplementary Table S1. Attenuated laser powers at four different lasers wavelength 325nm, 488nm, 633nm, and 785nm.** These values are measured laser powers after optical attenuator (namely None, D0.3, D0.6, D1, D2, D3, and D4) were inserted in the laser path, reducing the laser power from the original value to 60%, 30%, 10%, 1%, 0.1%, and 0.01%, respectively, for lasers wavelength.

| Wavelength (nm) | None (mW) | D0.3 (mW) | D0.6 (mW) | D1 (mW) | D2 ( $\mu$ W) | D3 ( $\mu$ W) | D4 ( $\mu$ W) |
|-----------------|-----------|-----------|-----------|---------|---------------|---------------|---------------|
| 325             | 15.3      | 10.4      | 6.6       | 2.6     | 308.1         | 47.0          | 26.4          |
| 488             | 15.1      | 7.5       | 4.3       | 1.9     | 113.9         | 12.7          | 2.0           |
| 633             | 34.9      | 18.0      | 9.5       | 2.9     | 233.5         | 32.6          | 3.4           |
| 785             | 79.2      | 43.5      | 22.5      | 9.6     | 868.7         | 87.7          | 11.9          |

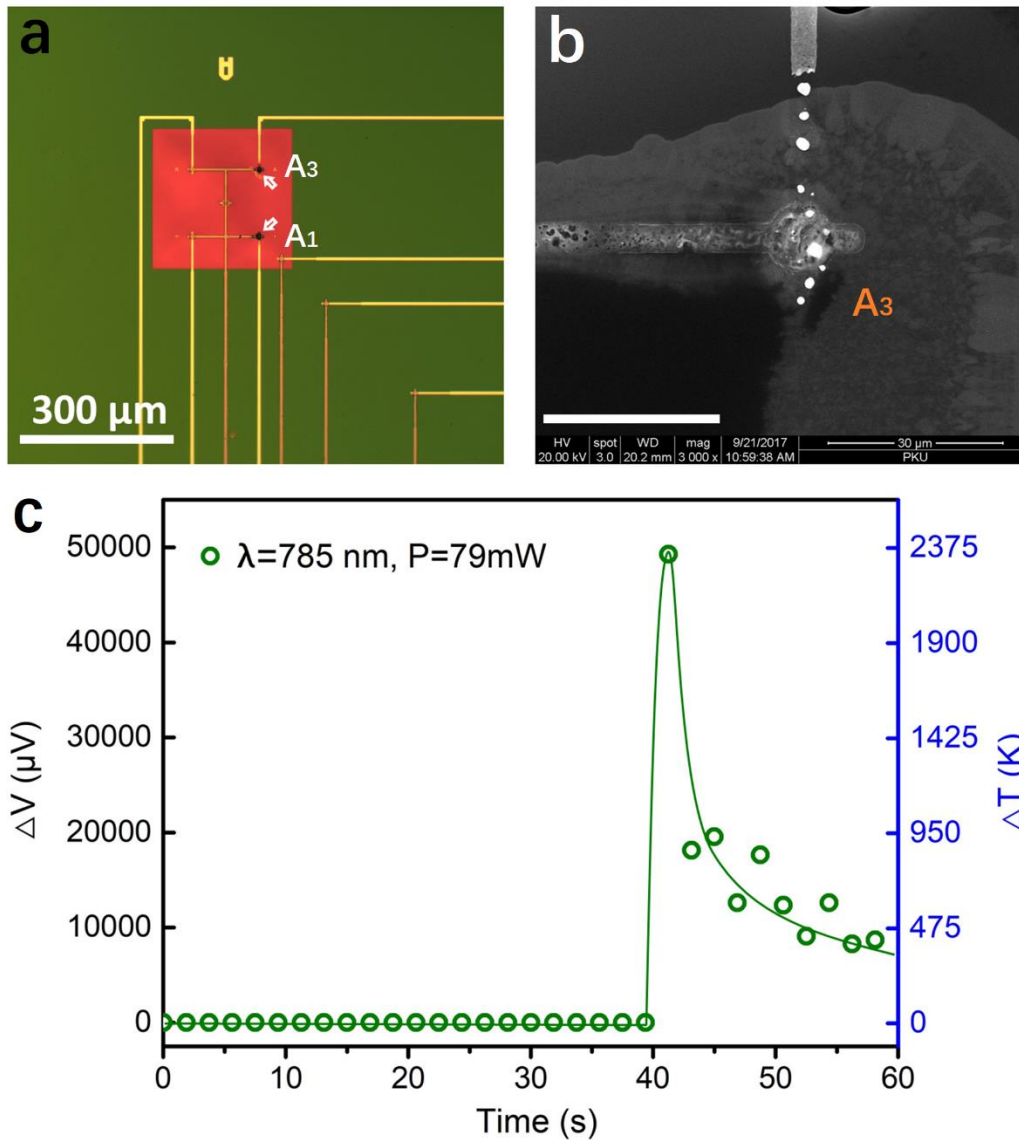

**Supplementary Fig. S1: A failed device after tested with a 785 nm laser at the power of 79.2 mW. (a)** Photograph of the device after measurement, showing that sensors A1 and A3 were burned out (turned black, marked with white arrows). **(b)** SEM microscopy of the burnt junction region of A3, showing molten and broken dots of Cr and Pd beams. **(c)** Real time measurement results of the device before and after the irradiation of 79 mW 785nm laser. A peak output of 49,300  $\mu$ V was recorded, corresponding to a peak temperature of 2350 K

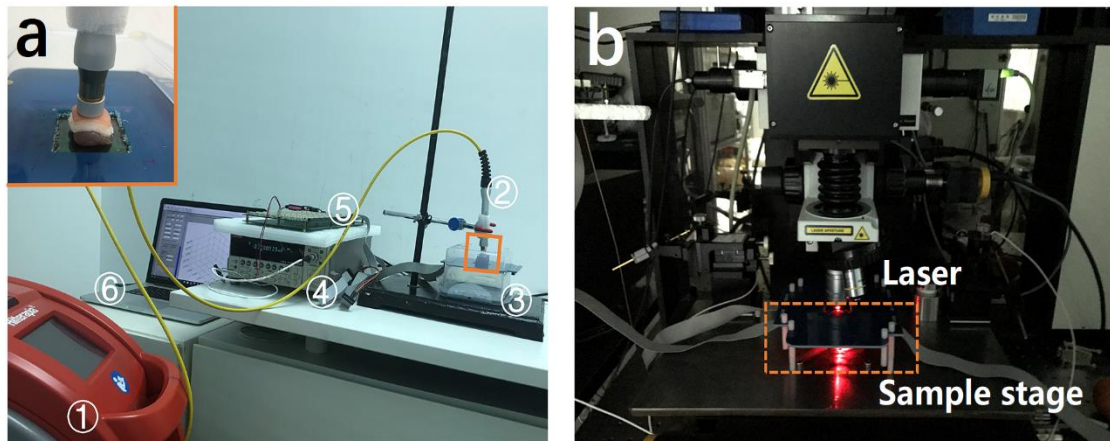

**Supplementary Fig. S2: Photographs of the measurement systems used in this work, one for practical clinic laser treatment, and the other for cleanroom applications. (a)** Photograph of the medical laser system used in clinic treatment, where ① is 1064 nm Nd:YAG pulsed laser system, ② is the laser cable, ③ is the sample stage and measurement sample, ④ is the Keithley 2182A nanovoltmeter, ⑤ is the 10×10 multiplexer and, and ⑥ is the computerized data acquisition system. An enlargement of the orange frame in the inset for details. **(b)** Photograph of the measurement system used in our cleanroom. Lasers of different wavelengths exit the microscope after passing through inner optical path. The orange dotted frame is the sample stage with the device.

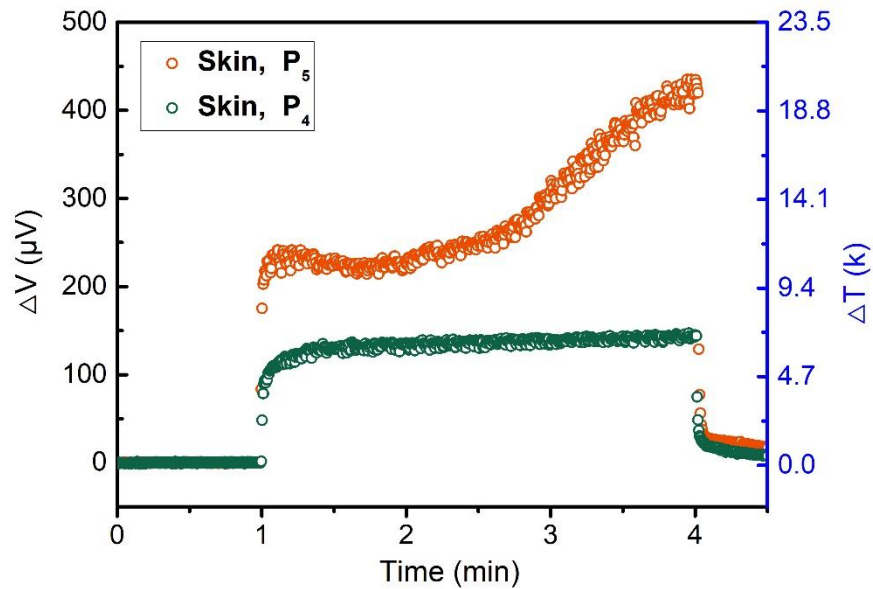

**Supplementary Fig. S3: Outputs of TFTCs for the same part of a porcine skin tissue sample under laser irradiation of two different powers.** The orange and green circles represent the photon fluxes that penetrate a 1.5 mm thick skin sample at laser powers of P<sub>5</sub> 7.1 W and P<sub>4</sub> 4.3W, respectively, both operated at 20 Hz. The corresponding local temperatures at the laser spots are shown with coordinates on the right.

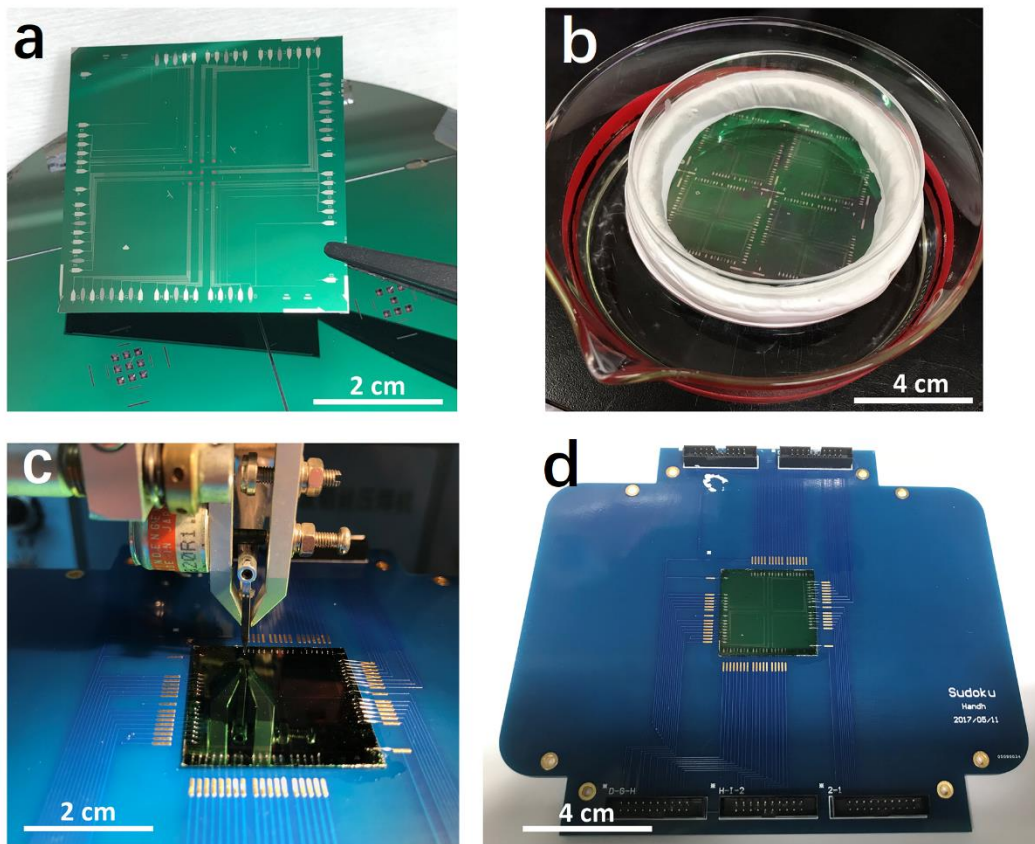

**Supplementary Fig. S4: Photographs of fabrication processes for the device with TFTC array on  $\text{Si}_3\text{N}_4$  windows used in this work. (a)** A typical Pd/Cr micro-TFTC array was prepared on the  $\text{Si}_3\text{N}_4/\text{Si}$  [100]/ $\text{Si}_3\text{N}_4$  substrate. **(b)** The device etched the freestanding  $\text{Si}_3\text{N}_4$  thin-film windows in 30 vol. % KOH at 80-85 °C in a water bath with a floating technique. **(c)** The micro-TFTC array sample was bonded to the Printed Circuit Board through the wire bonding process. **(d)** The device consists of micro-TFTC array and Printed Circuit Board.

**Supplementary Video S1: A video showing irradiation of 1064 nm laser pulses (from a Nd:YAG pulsed laser) on a 10 mm thick porcine skin-fat-muscle sample during a 120 s test process.** In this video, one sees that with the accumulating time for laser irradiation, the tissue gradually changed its color. At the end of the test, the sample surface was remarkably degenerated and burn spots occurred.

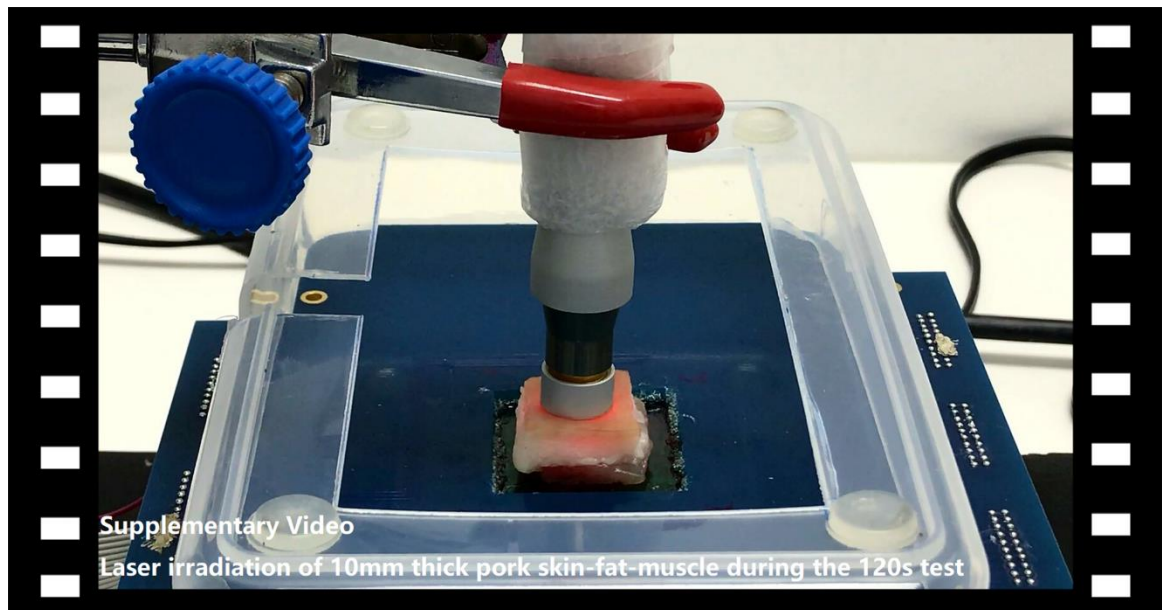

Supplement: c8ra05285a1.pdf [file c8ra05285a1.pdf]
